# Supplementary material
Source: PubMed Central journal article supplement (PMC2672473)
Supplement: 0902127106_0902127106SI.pdf [file 0902127106_0902127106SI.pdf]

# Supporting Information

Yoon et al. 10.1073/pnas.0902127106

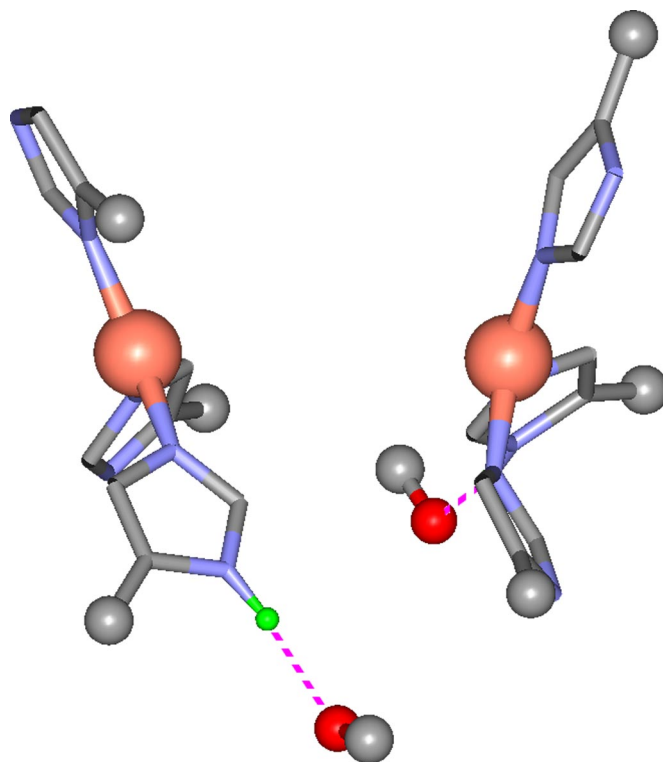

**Fig. S1.** Optimized structure of deoxy Lc<sup>T3</sup> with additional hydrogen bonds between two His ligands and backbone carbonyl groups. The backbone carbonyl groups are part of the HXH loops in the Lc<sup>T3</sup> site. The carbonyl groups were modeled with CH<sub>2</sub>O, and the positions of C and O atoms were fixed during the geometry optimization. The resulting Cu–Cu distance is 5.797 Å.

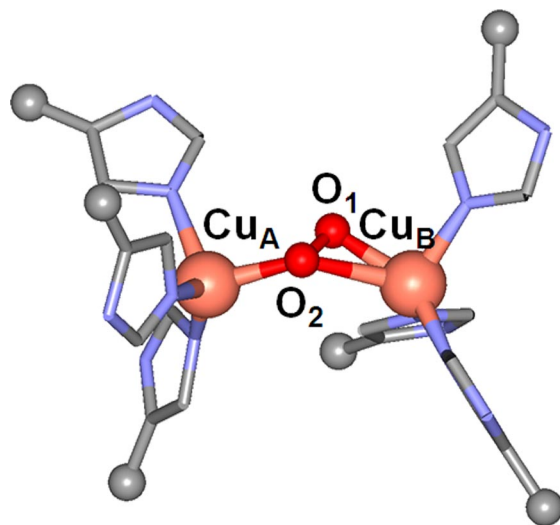

**Hc ( $S=1$ ,  $R_{\text{CuCu}} = 4.20\text{\AA}$ )**

Fig. S2. Optimized structure of oxy hemocyanin at  $S = 1$  spin state with  $R(\text{Cu}-\text{Cu})$  fixed at  $4.20\text{\AA}$ .

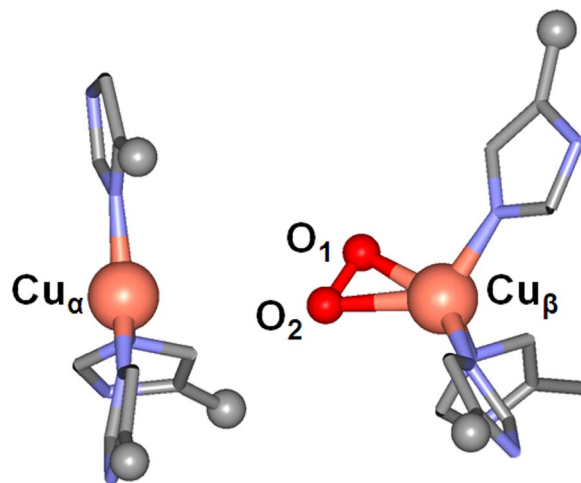

**Lc ( $M_S=0$ ,  $R_{\text{CuCu}} = 6.13\text{\AA}$ )**

Fig. S3. Optimized structure of oxy laccase (type 3) at the broken-symmetry ( $M_S = 0$ ) spin state with  $R(\text{Cu}-\text{Cu})$  optimized to  $6.13\text{\AA}$  and  $R(\text{O}-\text{O})$  to  $1.29\text{\AA}$ .

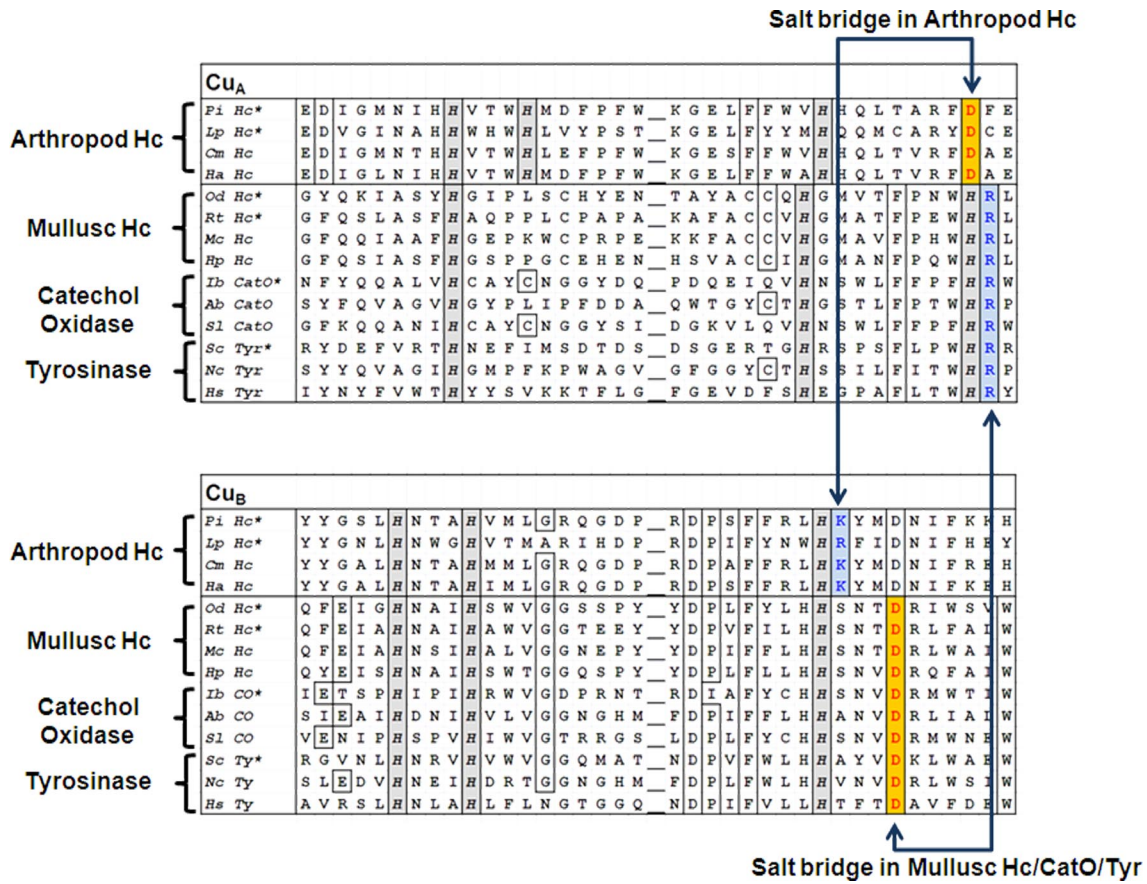

**Fig. S4.** Sequence alignment of various arthropod and mollusk hemocyanins, catechol oxidase, and tyrosinase. His ligands of Cu<sub>A</sub> (Upper) and Cu<sub>B</sub> (Lower) centers are indicated by gray boxes, and the conserved Arg/Lys and Asp that form salt bridges are indicated in blue and red, respectively. Proteins with X-ray structural data are indicated by asterisks.
